# Supplementary material
Source: publisher figshare collection journal article supplement (https://tandf.figshare.com/ndownloader/files/24396931)
Supplement: Supplementary file 1 [file 24396931]

**Electronic Supplementary Material**

**Role of biologically important imidazole moiety on the antimicrobial and anticancer activity of Fe(III) and Mn(II) complexes**

M. Shahnawaz Khana, Mohd Umar Hayata, Madiha Khanama, Haris Saeedb, Mohammad Owaisb Mohd Khalida*, M. Shahida, Musheer Ahmadc

*aDepartment of Chemistry, Aligarh Muslim University, Aligarh 202002*

*b* Interdisciplinary Biotechnology Unit, *Aligarh Muslim University, Aligarh 202002*

*cDepartment of Applied Chemistry, Aligarh Muslim University, Aligarh 202002*

**Corresponding author, Email: khalid215@gmail.com*

**Table 1S.** Selected bond angle and bond distance for **1** and **2**

| **Complex 1** |  | **Complex 2** |  |
| --- | --- | --- | --- |
| Bond lengths (Å) |  | Bond lengths (Å) |  |
| Fe01‒O2 | 2.019(3) | Mn1‒N2 | 2.2632(16) |
| Fe01‒O3 | 1.999(3) | Mn1‒N3 | 2.2627(16) |
| Fe01‒O6 | 2.028(3) | Mn1‒N5 | 2.2556(16) |
| Fe01‒ O7 | 1.993(3) | Bond angles (°) |  |
| Fe01‒N1 | 2.058(3) | N2‒Mn1‒N2 | 180.0 |
| Fe01‒N2 | 2.067(3) | N3‒Mn1‒N2 | 91.03(6) |
| Bond angles (°) |  | N3‒Mn1‒N2 | 88.97(6) |
| O3‒Fe01‒O2 | 151.94(10) | N3‒Mn1‒N3 | 180.0 |
| O6‒Fe01‒O2 | 95.77(12) | N5‒Mn1‒N2 | 90.71(6) |
| O6‒Fe01‒O3 | 90.89(11) | N5‒Mn1‒N2 | 89.29(6) |
| O7‒Fe01‒O2 | 92.50(13) | N5‒Mn1‒N2 | 89.29(6) |
| O7‒Fe01‒O3 | 94.46(12) | N5‒Mn1‒N3 | 89.44(6) |
| O7‒Fe01‒O6 | 151.61(10) | N5‒Mn1‒N3 | 90.56(6) |
| N1‒Fe01‒O2 | 76.07(12) | N5‒Mn1‒N3 | 89.44(6) |
| N1‒Fe01‒O3 | 75.95(11) | N5‒Mn1‒N5 | 180.0 2_656 |
| N1‒Fe01‒O6 | 108.29(11) | C1‒N2‒Mn1 | 129.84(13) |
| N1‒Fe01‒O7 | 100.05(12) | C3‒N2‒Mn1 | 124.73(14) |
| N2‒Fe01‒O2 | 104.13(11) | C4‒N3‒Mn1 | 126.08(14) |
| N2‒Fe01‒O3 | 103.93(11) | C6‒N3‒Mn1 | 128.90(13) |
| N2‒Fe01‒O6 | 75.77(11) | C7‒N5‒Mn1 | 128.65(13) |
| N2‒Fe01‒O7 | 75.88(11) | C9‒N5‒Mn1 | 126.05(14) |
| N2‒Fe01‒N1 | 175.93(12) |  |  |
| C1‒O2‒Fe01 | 120.0(2) |  |  |
| C7‒O3‒Fe01 | 121.0(2) |  |  |
| C8‒O6‒Fe01 | 120.3(2) |  |  |
| C14‒O7‒Fe01 | 122.0(2) |  |  |
| C2‒N1‒Fe01 | 118.8(2) |  |  |
| C6‒N1‒Fe01 | 118.9(3) |  |  |
| C9‒N2‒Fe01 | 119.0(2) |  |  |
| C13‒N2‒Fe01 | 118.6(2) |  |  |
